Correction

# Correction: Procedures for Behavioral Experiments in Head-Fixed Mice

The PLOS ONE Staff

There is an error in Figure 2. Please see the corrected Figure 2 here.

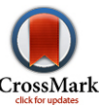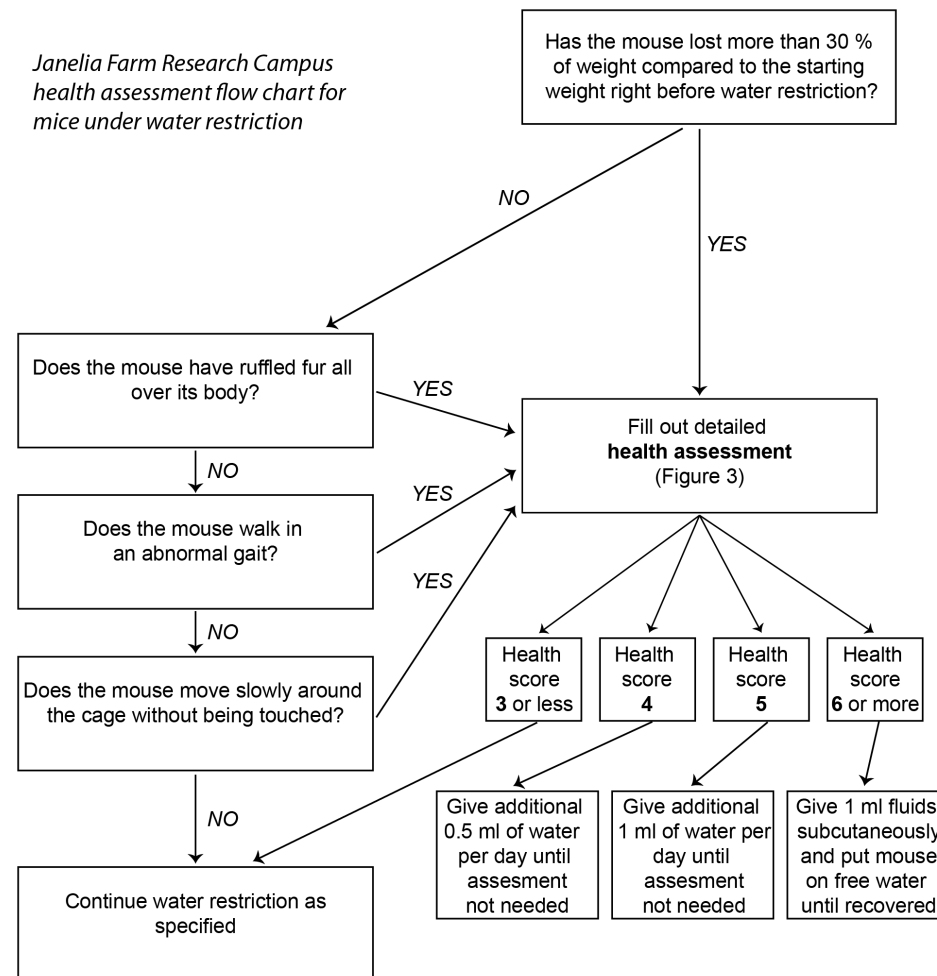

**Figure 2. Flowchart for monitoring mice under water restriction.**  
doi:10.1371/journal.pone.0088678.g002

## Reference

- Guo ZV, Hires SA, Li N, O'Connor DH, Komiyama T, et al. (2014) Procedures for Behavioral Experiments in Head-Fixed Mice. PLoS ONE 9(2): e88678. doi:10.1371/journal.pone.0088678

**Citation:** The PLOS ONE Staff (2014) Correction: Procedures for Behavioral Experiments in Head-Fixed Mice. PLOS ONE 9(6): e101397. doi:10.1371/journal.pone.0101397

**Published:** June 26, 2014

**Copyright:** © 2014 The PLOS ONE Staff. This is an open-access article distributed under the terms of the Creative Commons Attribution License, which permits unrestricted use, distribution, and reproduction in any medium, provided the original author and source are credited.
